# Supplementary material for: Persistent, and Asymptomatic Viral Infections and Whitefly-Transmitted Viruses Impacting Cantaloupe and Watermelon in Georgia, USA
Source: MDPI journal article supplement (doi:10.3390/v14061310), 2022-06-15
Supplement: s1 [file s1]

**Supplementary Material Table S1:** Prevalence and distribution of mixed infection of the *viruses* detected during 2019 and 2021 cantaloupe and watermelon survey

| Virus                                 | 2021       |       |       |        |        |        |            |       | 2019       |
|---------------------------------------|------------|-------|-------|--------|--------|--------|------------|-------|------------|
|                                       | Watermelon |       |       |        |        |        | Cantaloupe |       | Watermelon |
|                                       | Colquitt   | Crisp | Worth | Wilcox | Turner | Tift   | Turner     | Tift  | Colquitt   |
| CCYV + CuLCrV                         | -          | -     | -     | -      | -      | -      | -          | -     | 29(67)     |
| CmAV + CmEV                           | -          | -     | -     | -      | -      | -      | 3(1)       | 15(6) | -          |
| CmAV + WCLaV-1                        | -          | -     | -     | -      | 50(20) | 50(20) | -          | -     | -          |
| CmEV + WCLaV-1                        | -          | -     | -     | -      | 10(4)  | -      | -          | -     | -          |
| CuLCrV + CCYV + CYSDV                 | -          | -     | -     | -      | -      | -      | -          | -     | 1(2)       |
| CmAV + CmEV + WCLaV-1                 | -          | -     | -     | -      | 10(4)  | -      | -          | -     | -          |
| <b>Total number of samples tested</b> | 25         | 60    | 20    | 60     | 40     | 40     | 40         | 40    | 43         |

Virus acronyms used: cucurbit chlorotic yellows virus (CCYV), cucurbit leaf crumple virus (CuLCrV), cucumis melo amalgavirus (CmAV), cucumis melo endornavirus (CmEV), cucurbit yellow stunting disorder virus (CYSDV) and watermelon crinkle leaf-associated virus 1 (WCLaV-1).
